# Supplementary material for: Degradation of Organic Methyl Orange (MO) Dye Using a Photocatalyzed Non-Ferrous Fenton Reaction
Source: MDPI journal article supplement (doi:10.3390/nano13040639), 2023-02-06
Supplement: s1 [file s1]

## Supplementary Materials

# Degradation of Organic Methyl Orange (MO) Dye Using Photocatalyzed Non-Ferrous Fenton Reaction

Sifani Zavahir<sup>1</sup>, Tasneem Elmakki<sup>1</sup>, Nourhan Ismail<sup>1</sup>, Mona Gulied<sup>1</sup>, Hyunwoong Park<sup>2</sup>,

Dong Suk Han<sup>1,3,\*</sup>

<sup>1</sup>Center Advanced Materials (CAM), Qatar University, P.O. Box 2713, Doha, Qatar

<sup>2</sup>School of Energy Engineering, Kyungpook National University, Daegu 41566, Republic of Korea

<sup>3</sup>Department of Chemical Engineering, College of Engineering, Qatar University, P.O. Box 2713, Doha, Qatar

\* Correspondence: dhan@qu.edu.qa; Tel.: +974-4403-5686

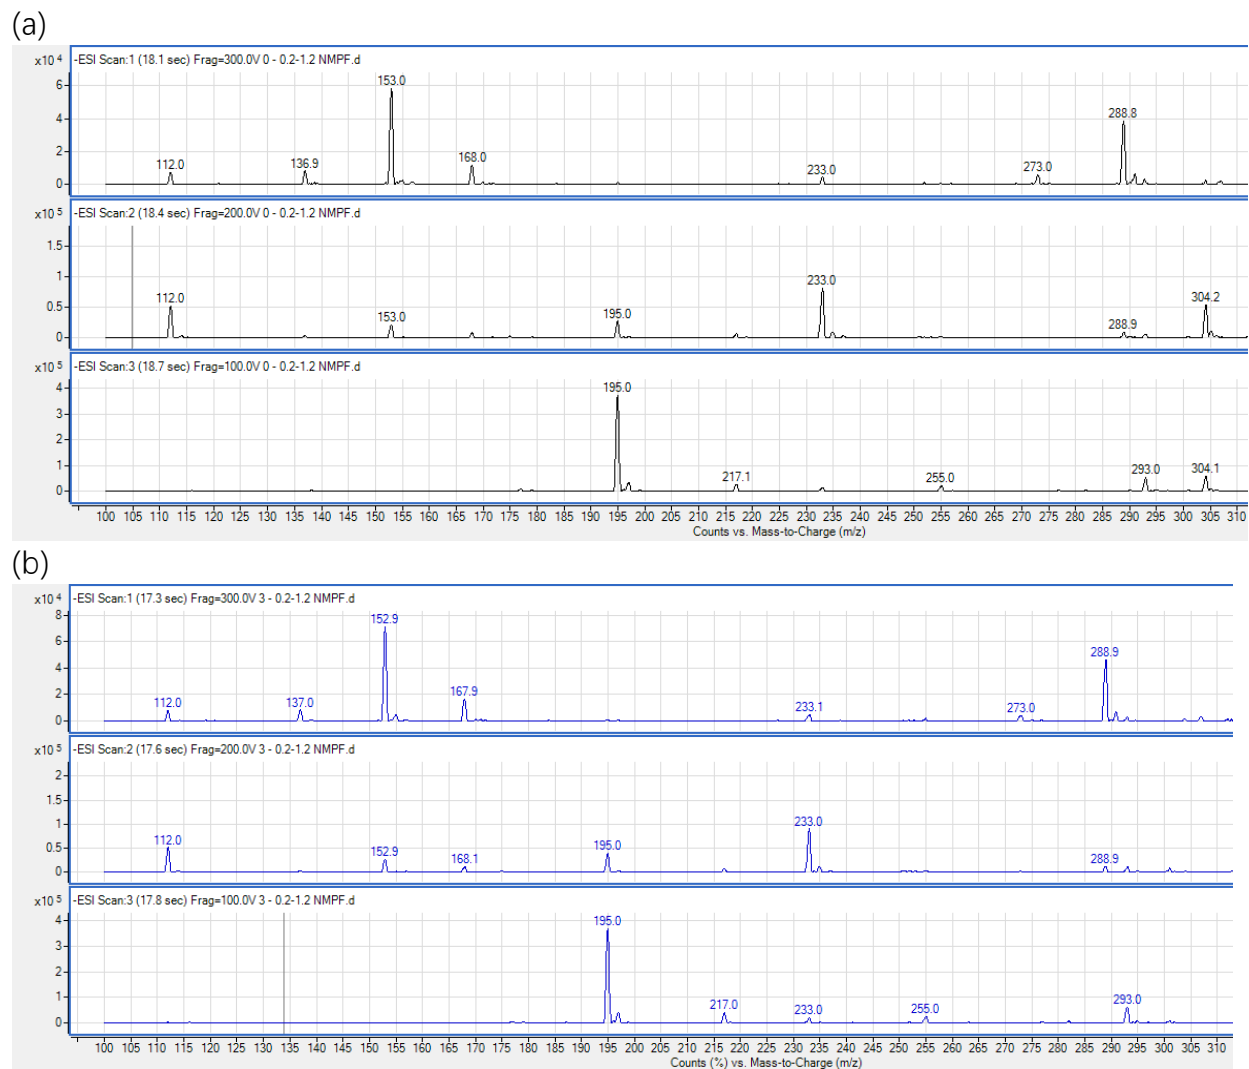

**Figure S1.** The LC/MS/MS chromatograms of the reaction solution at two different time intervals. The presence of methyl orange dye at  $m/z$  304 (a) after 20 minutes of the experiment and (b) after 40 minutes.
